# Supplementary material for: Global Mortality Burden of Cirrhosis and Liver Cancer Attributable to Injection Drug Use, 1990–2016: An Age-Period-Cohort and Spatial Autocorrelation Analysis
Source: PubMed Central journal article supplement (PMC5800269; doi:10.3390/ijerph15010170), 2018-01-22
Supplement: ijerph-15-00170-s001.pdf [file ijerph-15-00170-s001.pdf]

**Table S1.** Age-period-cohort (APC) model analysis results for global mortality of IDU-attributable cirrhosis.

| Virables  | Coef   | 95%CI          | S.E. | RR    | 95%CI         |
|-----------|--------|----------------|------|-------|---------------|
| Intercept | 8.37   | (8.36 - 8.38)  | 0.00 |       |               |
| Age       |        |                |      |       |               |
| 15-19     | -2.88  | (-2.95, -2.82) | 0.03 | 1.00  |               |
| 20-24     | -1.35  | (-1.37, -1.32) | 0.01 | 4.65  | (4.49-4.82)   |
| 25-29     | -0.51  | (-0.53, -0.49) | 0.01 | 10.70 | (10.25-11.17) |
| 30-34     | 0.15   | (0.14, 0.17)   | 0.01 | 20.83 | (19.87-21.83) |
| 35-39     | 0.58   | (0.57, 0.60)   | 0.01 | 32.03 | (30.49-33.65) |
| 40-44     | 0.86   | (0.85, 0.87)   | 0.01 | 42.31 | (40.20-44.53) |
| 45-49     | 0.98   | (0.97, 0.99)   | 0.01 | 47.78 | (45.33-50.36) |
| 50-54     | 0.98   | (0.97, 0.99)   | 0.00 | 47.60 | (45.12-50.22) |
| 55-59     | 0.85   | (0.84, 0.86)   | 0.00 | 41.84 | (39.64-44.16) |
| 60-64     | 0.65   | (0.64, 0.66)   | 0.00 | 34.15 | (32.35-36.04) |
| 65-69     | 0.34   | (0.33, 0.35)   | 0.01 | 25.21 | (23.90-26.59) |
| 70-74     | -0.06  | (-0.07, -0.05) | 0.01 | 16.88 | (16.03-17.78) |
| 75-79     | -0.59  | (-0.61, -0.58) | 0.01 | 9.88  | (9.41-10.38)  |
| Period    |        |                |      |       |               |
| 1990      | -0.59  | (-0.59, -0.58) | 0.00 | 1.00  |               |
| 1995      | -0.30  | (-0.31, 0.29)  | 0.00 | 1.33  | (1.33-1.33)   |
| 2000      | -0.12  | (-0.13, -0.12) | 0.00 | 1.59  | (1.58-1.59)   |
| 2005      | 0.14   | (0.13, 0.14)   | 0.00 | 2.06  | (2.06-2.07)   |
| 2010      | 0.33   | (0.32, 0.33)   | 0.00 | 2.50  | (2.49-2.50)   |
| 2015      | 0.54   | (0.53, 0.55)   | 0.00 | 3.08  | (3.08-3.09)   |
| Cohort    |        |                |      |       |               |
| 1915-1919 | 0.51   | (0.47, 0.55)   | 0.02 | 1.00  |               |
| 1920-1924 | 0.30   | (0.27, 0.32)   | 0.01 | 0.81  | (0.80-0.82)   |
| 1925-1929 | 0.43   | (0.41, 0.45)   | 0.01 | 0.92  | (0.90-0.94)   |
| 1930-1934 | 0.42   | (0.40, 0.43)   | 0.01 | 0.91  | (0.89-0.93)   |
| 1935-1939 | 0.29   | (0.28, 0.31)   | 0.01 | 0.80  | (0.78-0.82)   |
| 1940-1944 | 0.28   | (0.26, 0.29)   | 0.01 | 0.79  | (0.77-0.81)   |
| 1945-1949 | 0.10   | (0.08, 0.11)   | 0.01 | 0.66  | (0.64-0.68)   |
| 1950-1954 | 0.17   | (0.15, 0.18)   | 0.01 | 0.71  | (0.69-0.73)   |
| 1955-1959 | 0.23   | (0.21, 0.24)   | 0.01 | 0.75  | (0.73-0.77)   |
| 1960-1964 | 0.16   | (0.15, 0.17)   | 0.01 | 0.70  | (0.96-0.72)   |
| 1965-1969 | 0.04   | (0.02, 0.05)   | 0.01 | 0.62  | (0.61-0.64)   |
| 1970-1974 | -0.14  | (-0.16, -0.12) | 0.01 | 0.52  | (0.51-0.53)   |
| 1975-1979 | -0.28  | (-0.30, -0.26) | 0.01 | 0.45  | (0.44-0.46)   |
| 1980-1984 | -0.37  | (-0.39, -0.35) | 0.01 | 0.41  | (0.41-0.42)   |
| 1985-1989 | -0.40  | (-0.42, -0.37) | 0.01 | 0.40  | (0.40-0.41)   |
| 1990-1994 | -0.45  | (-0.48, -0.42) | 0.02 | 0.38  | (0.38-0.38)   |
| 1995-1999 | -0.57  | (-0.62, -0.52) | 0.03 | 0.34  | (0.34-0.34)   |
| 2000-2004 | -0.71  | (-0.86, 0.57)  | 0.07 | 0.29  | (0.26-0.33)   |
| Deviance  | 385.85 |                |      |       |               |
| AIC       | 16.05  |                |      |       |               |
| BIC       | 194.15 |                |      |       |               |

Note: \* p < 0.05; \*\* p < 0.01; \*\*\* p < 0.001; Coef.: Coefficient; S.E.: Standard error; RR: Relative risk; CI: Confidence interval; AIC: Akaike Information Criteria; BIC: Bayesian Information Criteria.

**Table S2.** Age-period-cohort (APC) model analysis results for global mortality of IDU-attributable liver cancer.

| Virables  | Coef      | 95%CI          | S.E. | RR    | 95%CI         |
|-----------|-----------|----------------|------|-------|---------------|
| Intercept | 6.83      | (6.80 - 6.85)  | 0.01 |       |               |
| Age       |           |                |      |       |               |
| 15-19     | -2.48 *** | (-2.61, -2.34) | 0.07 | 1.00  |               |
| 20-24     | -1.86 *** | (-1.95, -1.78) | 0.04 | 1.85  | (1.76-1.95)   |
| 25-29     | -1.27 *** | (-1.33, -1.21) | 0.03 | 3.33  | (3.09-3.59)   |
| 30-34     | -0.67 *** | (-0.72, -0.63) | 0.02 | 6.07  | (5.54-6.64)   |
| 35-39     | -0.22 *** | (-0.26, -0.18) | 0.02 | 9.57  | (8.66-10.56)  |
| 40-44     | 0.24 ***  | (0.21, 0.27)   | 0.02 | 15.07 | (13.55-16.76) |
| 45-49     | 0.65 ***  | (0.62, 0.67)   | 0.01 | 22.78 | (20.37-25.48) |
| 50-54     | 0.95 ***  | (0.93, 0.97)   | 0.01 | 30.66 | (27.30-34.44) |
| 55-59     | 1.09 ***  | (1.08, 1.11)   | 0.01 | 35.53 | (31.54-40.03) |
| 60-64     | 1.12 ***  | (1.11, 1.14)   | 0.01 | 36.63 | (32.48-41.30) |
| 65-69     | 1.01 ***  | (0.99, 1.02)   | 0.01 | 32.54 | (28.89-36.65) |
| 70-74     | 0.85 ***  | (0.83, 0.87)   | 0.01 | 27.93 | (24.87-31.37) |
| 75-79     | 0.60 ***  | (0.57, 0.62)   | 0.01 | 21.60 | (19.32-24.16) |
| Period    |           |                |      |       |               |
| 1990      | -0.72 *** | (-0.74, -0.70) | 0.01 | 1.00  |               |
| 1995      | -0.41 *** | (-0.43, -0.40) | 0.01 | 1.36  | (1.36-1.37)   |
| 2000      | -0.15 *** | (-0.16, -0.14) | 0.01 | 1.78  | (1.76-1.79)   |
| 2005      | 0.12 ***  | (0.11, 0.13)   | 0.01 | 2.33  | (2.31-2.35)   |
| 2010      | 0.41 ***  | (0.40, 0.43)   | 0.01 | 3.11  | (3.09-3.13)   |
| 2015      | 0.75 ***  | (0.73, 0.76)   | 0.01 | 4.34  | (4.32-4.36)   |
| Cohort    |           |                |      |       |               |
| 1915-1919 | 0.50      | (0.45, 0.56)   | 0.03 | 1.00  |               |
| 1920-1924 | 0.40      | (0.36, 0.44)   | 0.02 | 0.90  | (0.89-0.92)   |
| 1925-1929 | 0.58 ***  | (0.55, 0.62)   | 0.02 | 1.08  | (1.06-1.11)   |
| 1930-1934 | 0.61 ***  | (0.58, 0.64)   | 0.01 | 1.11  | (1.08-1.14)   |
| 1935-1939 | 0.55 ***  | (0.52, 0.57)   | 0.01 | 1.05  | (1.01-1.08)   |
| 1940-1944 | 0.51 ***  | (0.49, 0.54)   | 0.01 | 1.01  | (0.98-1.04)   |
| 1945-1949 | 0.41 ***  | (0.38, 0.43)   | 0.01 | 0.91  | (0.88-0.93)   |
| 1950-1954 | 0.50 ***  | (0.47, 0.53)   | 0.01 | 0.99  | (0.97-1.02)   |
| 1955-1959 | 0.59 ***  | (0.56, 0.62)   | 0.02 | 1.09  | (1.06-1.11)   |
| 1960-1964 | 0.44 ***  | (0.41, 0.48)   | 0.02 | 0.94  | (0.92-0.96)   |
| 1965-1969 | 0.30 ***  | (0.26, 0.34)   | 0.02 | 0.82  | (0.80-0.83)   |
| 1970-1974 | 0.12 ***  | (0.07, 0.16)   | 0.02 | 0.68  | (0.67-0.69)   |
| 1975-1979 | -0.19 *** | (-0.25, -0.14) | 0.03 | 0.50  | (0.50-0.50)   |
| 1980-1984 | -0.58 *** | (-0.64, -0.51) | 0.03 | 0.34  | (0.34-0.34)   |
| 1985-1989 | -0.78 *** | (-0.86, -0.70) | 0.04 | 0.28  | (0.27-0.28)   |
| 1990-1994 | -0.92 *** | (-1.02, -0.81) | 0.05 | 0.24  | (0.23-0.25)   |
| 1995-1999 | -1.31 *** | (-1.48, -1.14) | 0.08 | 0.16  | (0.15-0.18)   |
| 2000-2004 | -1.73 *** | (-2.10, -1.37) | 0.19 | 0.11  | (0.08-0.15)   |
| Deviance  | 79.46     |                |      |       |               |
| AIC       | 10.70     |                |      |       |               |
| BIC       | -112.23   |                |      |       |               |

Note: \*  $p < 0.05$ ; \*\*  $p < 0.01$ ; \*\*\*  $p < 0.001$ ; Coef.: Coefficient; S.E.: Standard error; RR: Relative risk; CI: Confidence interval; AIC: Akaike Information Criterion; BIC: Bayesian Information Criterion.
